# Supplementary material for: Computational investigation of novel pyrimidine derivatives as potent FAK inhibitorsvia3D-QSAR, molecular docking, molecular dynamics simulation and retrosynthesis
Source: Royal Society of Chemistry journal article supplement (doi:10.1039/d3nj02471g), 2023-01-01
Supplement: d3nj02471g1.pdf [file d3nj02471g1.pdf]

## Computational investigation of novel pyrimidine derivatives as potent FAK inhibitors via 3D-QSAR, molecular docking, molecular dynamics simulation and retrosynthesis

Salma El Bahi,<sup>a</sup> Meryem Boutalaka,<sup>a</sup> Moulay Ahfid El Alaouy,<sup>a</sup> Soukaina Bouamrane,<sup>a</sup> Marwa Alaqrbeh,<sup>\*b</sup> M'barek Choukrad,<sup>a</sup> Abdelouahid Sbai,<sup>a</sup> Mohammed Bouachrine,<sup>a,c</sup> and Tahar Lakhlifi<sup>a</sup>

### Supplementary Table

**Table S1** Chemical structures of the investigated molecules and their pIC<sub>50</sub> values

| No. |          | Basic structure                                                                     | A                                                                                   | R <sub>1</sub>                                                                      | R <sub>2</sub>                                                                       | pIC <sub>50</sub><br>(exp) | CoMSIA/ HD                  |          |
|-----|----------|-------------------------------------------------------------------------------------|-------------------------------------------------------------------------------------|-------------------------------------------------------------------------------------|--------------------------------------------------------------------------------------|----------------------------|-----------------------------|----------|
|     |          |                                                                                     |                                                                                     |                                                                                     |                                                                                      |                            | pIC <sub>50</sub><br>(pred) | Residual |
| 1   | Training | 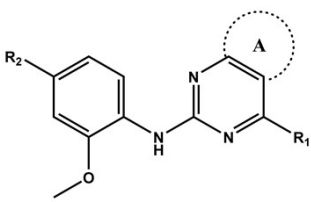 |    |    |    | 7.435                      | 7.783                       | -0.348   |
| 2   | Training |                                                                                     |    |   |    | 7.559                      | 7.509                       | 0.05     |
| 4   | Training |                                                                                     |  |  |  | 6.843                      | 6.692                       | 0.151    |
| 5   | Training |                                                                                     |  |  |  | 6.481                      | 7.032                       | -0.551   |
| 6   | Training |                                                                                     |  |  |  | 6.761                      | 6.862                       | -0.101   |
| 7   | Training |                                                                                     |  |  |  | 8.413                      | 8.127                       | 0.286    |
| 8   | Test     |                                                                                     |  |  |  | 8.536                      | 7.656                       | 0.880    |
| 9   | Training |                                                                                     |  |  |  | 8.690                      | 8.459                       | 0.231    |
| 10  | Training |                                                                                     |  |  |  | 8.607                      | 8.355                       | 0.252    |
| 11  | Training |                                                                                     |  | H                                                                                   |  | 7.978                      | 8.21                        | -0.232   |

|    |          |                                                                                     |                                                                                     |                                                                                    |                                                                                      |                                                                                     |       |        |
|----|----------|-------------------------------------------------------------------------------------|-------------------------------------------------------------------------------------|------------------------------------------------------------------------------------|--------------------------------------------------------------------------------------|-------------------------------------------------------------------------------------|-------|--------|
| 12 | Training | 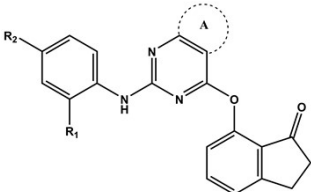   |    | H                                                                                  |    | 7.913                                                                               | 8.193 | -0.280 |
| 13 | Test     |                                                                                     |    | OCH <sub>3</sub>                                                                   |    | 7.943                                                                               | 7.838 | 0.105  |
| 18 | Training |                                                                                     |    | OCH <sub>3</sub>                                                                   |    | 6.025                                                                               | 5.877 | 0.148  |
| 24 | Training |                                                                                     |    | H                                                                                  |    | 6.960                                                                               | 6.835 | 0.125  |
| 25 | Training |                                                                                     |    | H                                                                                  |    | 6.611                                                                               | 6.56  | 0.051  |
| 28 | Training |                                                                                     |    | OCH <sub>3</sub>                                                                   |    | 7.562                                                                               | 7.316 | 0.246  |
| 31 | Training |                                                                                     |    | OCH <sub>3</sub>                                                                   |    | 6.636                                                                               | 6.425 | 0.211  |
| 32 | Training |                                                                                     |    | OCH <sub>3</sub>                                                                   |    | 6.184                                                                               | 6.493 | -0.309 |
| 33 | Training |                                                                                     |    | OCH <sub>3</sub>                                                                   |    | 6.609                                                                               | 6.603 | 0.006  |
| 35 | Training |                                                                                     |  |  | -                                                                                    |  | 8.018 | 8.043  |
| 36 | Training |  |                                                                                     | -                                                                                  |  | 8.724                                                                               | 8.66  | 0.064  |
| 37 | Training |  |                                                                                     | -                                                                                  |  | 7.964                                                                               | 8.079 | -0.115 |
| 38 | Test     |  |                                                                                     | -                                                                                  |  | 7.001                                                                               | 8.261 | -1.26  |
| 39 | Test     |  |                                                                                     | -                                                                                  |  | 8.147                                                                               | 7.864 | 0.283  |
| 40 | Training |  |                                                                                     | -                                                                                  |  | 8.249                                                                               | 8.162 | 0.087  |
| 41 | Training |  |                                                                                     | -                                                                                  |  | 8.319                                                                               | 8.244 | 0.075  |
| 42 | Test     |  |                                                                                     | -                                                                                  |  | 7.687                                                                               | 7.782 | -0.095 |
| 43 | Training |  |                                                                                     | -                                                                                  |  | 8.377                                                                               | 8.557 | -0.180 |
| 44 | Training |  |                                                                                     | -                                                                                  |  | 8.199                                                                               | 8.342 | -0.143 |

|    |          |  |                                                                                   |   |                                                                                    |       |       |       |
|----|----------|--|-----------------------------------------------------------------------------------|---|------------------------------------------------------------------------------------|-------|-------|-------|
| 45 | Training |  |  | - |  | 8.406 | 8.104 | 0.302 |
| 46 | Test     |  |  | - |  | 8.043 | 7.798 | 0.245 |

**Table S2** Statistical parameters of numerous Y-Randomization tests for the CoMSIA/HD model

| Model    | Q <sup>2</sup> | R <sup>2</sup> | Model     | Q <sup>2</sup> | R <sup>2</sup> |
|----------|----------------|----------------|-----------|----------------|----------------|
| Random 1 | -0.200         | 0.061          | Random 6  | -0.225         | 0.032          |
| Random 2 | -0.110         | 0.127          | Random 7  | -0.222         | 0.043          |
| Random 3 | -0.402         | 0.0098         | Random 8  | -0.164         | 0.078          |
| Random 4 | -0.276         | 0.105          | Random 9  | -0.319         | 0.001          |
| Random 5 | -0.178         | 0.096          | Random 10 | -0.202         | 0.126          |
| Original | <b>0.699</b>   | <b>0.931</b>   |           |                |                |

### Supplementary Figure

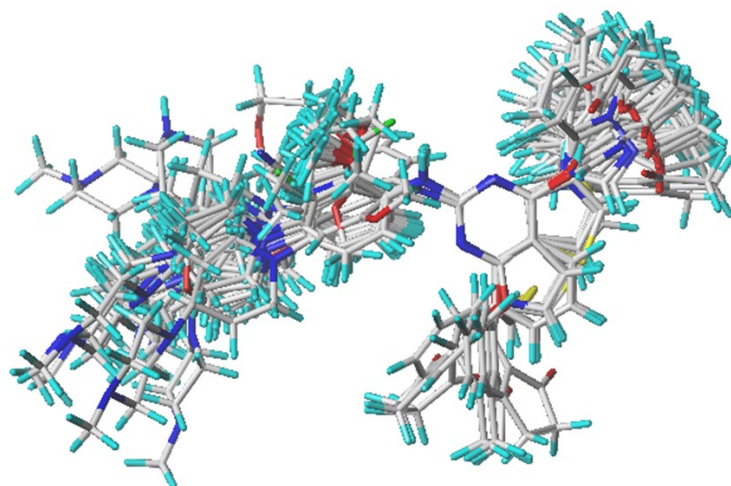

**Fig. S1** Alignment of 31 compounds under investigation.
